# Supplementary material for: Unexpected link between polyketide synthase and calcium carbonate biomineralization
Source: PubMed Central journal article supplement (PMC4604110; doi:10.1186/s40851-014-0001-0), 2015-01-13
Supplement: 40851_2014_1_MOESM7_ESM.pdf [file 40851_2014_1_MOESM7_ESM.pdf]

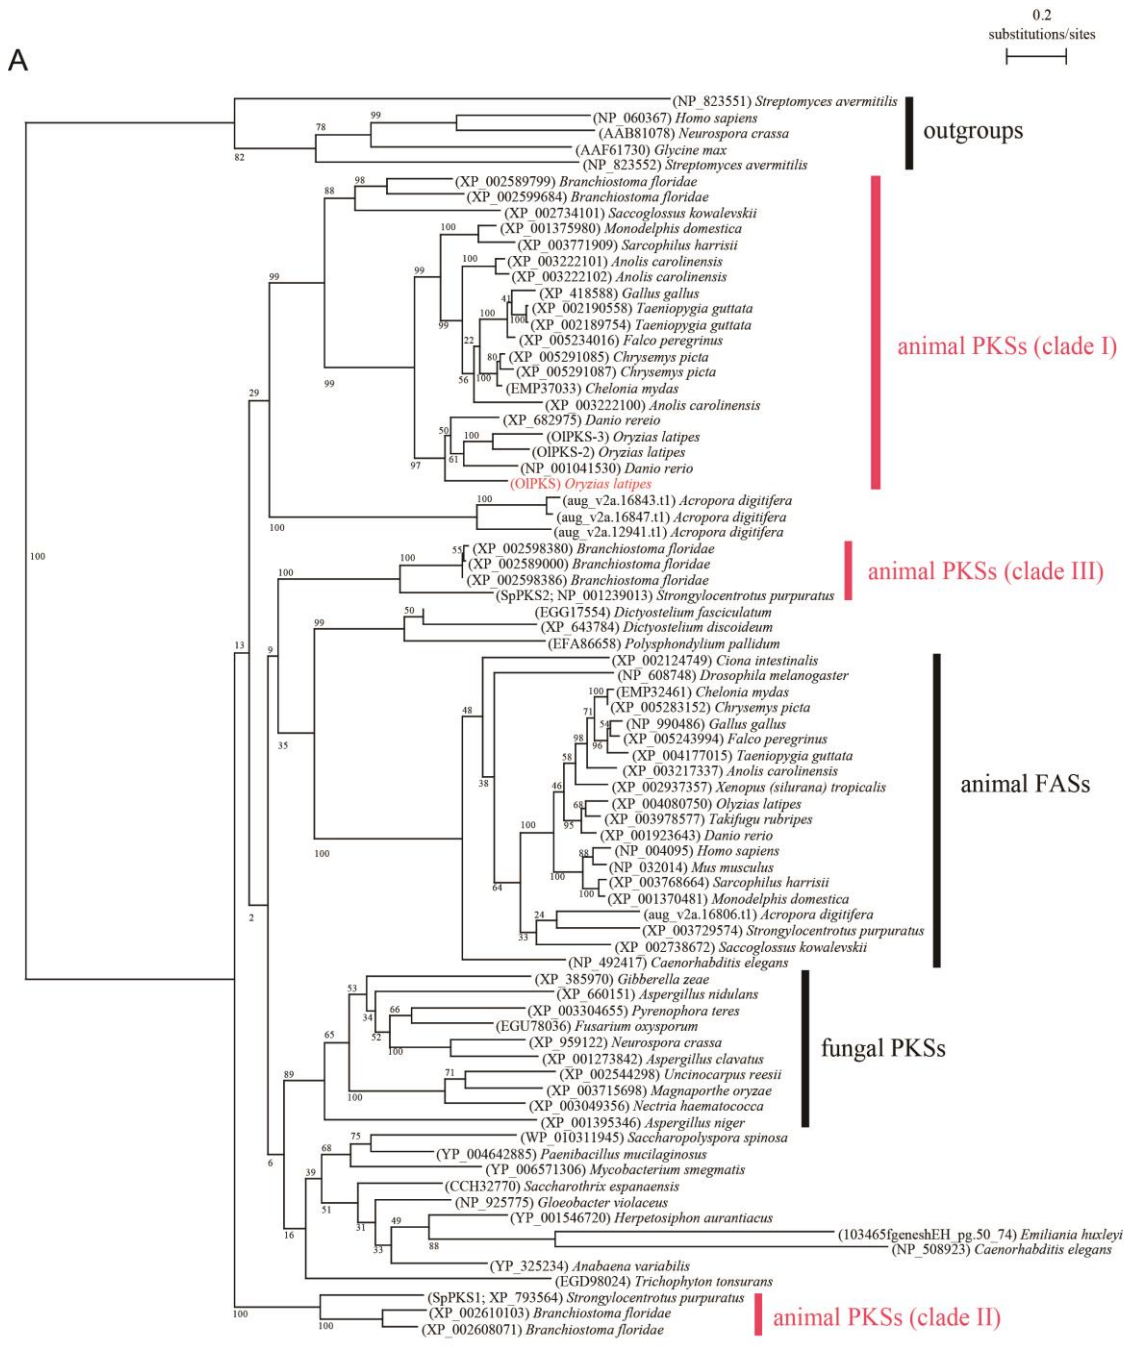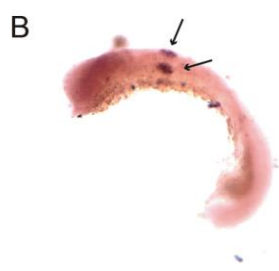

**C**

| MO                     | fully or partially<br>crystalized spicule | no spicule | developmental<br>arrest and necrotic<br>death | total | note            |
|------------------------|-------------------------------------------|------------|-----------------------------------------------|-------|-----------------|
| HpPKS-1 100uM          | 109                                       | 0          | 6                                             | 115   | no pigmentation |
| 200uM                  | 114                                       | 0          | 264                                           | 378   | no pigmentation |
| HpPKS-1 Control 200uM  | 246                                       | 0          | 55                                            | 301   |                 |
| 50uM                   | 61                                        | 79         | 0                                             | 140   |                 |
| 100uM                  | 5                                         | 149        | 0                                             | 154   |                 |
| 200uM                  | 10                                        | 477        | 0                                             | 487   |                 |
| HpPKS-2 Control 200uM  | 288                                       | 0          | 1                                             | 289   |                 |
| Standard Control 200uM | 237                                       | 0          | 8                                             | 245   |                 |

**Additional file 4.**

Broad distribution of animal PKSs. (A) Maximum parsimony phylogenetic estimate of relationships among animal type I PKSs and FASs, based on an alignment of amino acid sequences of the KS domain. Animal PKSs containing OIPKS are not divided from other bacterial or fungal PKSs, as indicated by low values of the bootstrap. By contrast, the animal FAS clade is clearly separated from animal PKSs. Protein accession number of Genbank or other database is shown with species name. Numbers described around branches indicate percentage of the bootstrap value supporting each clade. Branch length indicates number of inferred amino acid changes. (B) Representative image of whole-mount *in situ* hybridization of zebrafish embryo using probes for *pks* homologue. The transcript of a *pks* homologue, *drpks(wu:fc01d11)*, is exclusively expressed in zebrafish OV at the 20 somite-stage (19hpf). Arrows: OVs. (C) Summary of knockdown experiment using MOs. Injected embryos are categorized by the phenotype of spicule. HpPKS-1 knockdown animal lacked pigment while HpPKS-1 control MO (CMO)-injected animals showed normal pigmentation. These two morphants didn't show any spicule abnormality. Injection of HpPKS-1 MO and HpPKS-1 CMO at high concentration (200  $\mu$ M) caused developmental arrest at the gastrulation. Various concentrations of HpPKS-2 MO injection (three levels; 50, 100 and 200  $\mu$ M) shows dose dependency. All HpPKS-2 CMO-injected embryos showed no spicule defect. Standard control MO did not give any effect.
